# Supplementary material for: Exploring subjective responses in high-intensity multimodal training: an online cross-sectional survey
Source: HighWire-hosted journal article supplement (doi:10.1136/bmjopen-2023-073659), 2023-09-01
Supplement: bmjopen-2023-073659supp003_data_supplement.pdf [file bmjopen-2023-073659supp003_data_supplement.pdf]

Supplementary Table S2 Survey instrument

| Field                                                                                                                                                      | Answer Choice                                                                                                         |
|------------------------------------------------------------------------------------------------------------------------------------------------------------|-----------------------------------------------------------------------------------------------------------------------|
| 1. Demographics                                                                                                                                            |                                                                                                                       |
| Country                                                                                                                                                    | Country drop down                                                                                                     |
| Sex                                                                                                                                                        | 1. Male                                                                                                               |
|                                                                                                                                                            | 2. Female                                                                                                             |
|                                                                                                                                                            | 3. Other                                                                                                              |
| Age, y                                                                                                                                                     | Below 18 years                                                                                                        |
|                                                                                                                                                            | 18-65                                                                                                                 |
|                                                                                                                                                            | Over 65 years                                                                                                         |
| 2. Participation Information                                                                                                                               |                                                                                                                       |
| Figure 1. Visual representation of a) HIMT session that combines aerobic and resistance-based exercise; and b) aerobic and bodyweight-based exercise only. |                                                                                                                       |
|                                                                                                                                                            |                                                                                                                       |
| Do you regularly participate in HIMT? (at least 2 days per week)*                                                                                          | 1. Yes                                                                                                                |
|                                                                                                                                                            | 2. No                                                                                                                 |
| Is this due to current or previous COVID-19 restrictions?                                                                                                  | 1. Yes                                                                                                                |
|                                                                                                                                                            | 2. No                                                                                                                 |
| c) How many days per week do you participate in HIMT?*                                                                                                     | Numerical 1-7                                                                                                         |
| How long have you been regularly participating in HIMT? (at least 2 days per week)*                                                                        | 1. Less than 6 months                                                                                                 |
|                                                                                                                                                            | 2. 6-9 months                                                                                                         |
|                                                                                                                                                            | 3. 9-12 months                                                                                                        |
|                                                                                                                                                            | 4. 12-18 months                                                                                                       |
|                                                                                                                                                            | 5. Longer than 18 months                                                                                              |
| d) Where do you currently participate in HIMT?<br>(Tick ALL that apply)                                                                                    | 1. Specialised group / challenge / box / bootcamp style training gym e.g. F45, Orange Theory, CrossFit® affiliate gym |
|                                                                                                                                                            | 2. Traditional gym (group classes) e.g. Fitness First, Crunch Fitness, Anytime Fitness                                |
|                                                                                                                                                            | 3. Traditional gym (by myself) e.g. Fitness First, Crunch Fitness, Anytime Fitness                                    |
|                                                                                                                                                            | 4. Home gym (in my own or someone else's home)                                                                        |
|                                                                                                                                                            | 5. Outdoors in a group                                                                                                |
|                                                                                                                                                            | 6. Outdoors 1 on 1                                                                                                    |
|                                                                                                                                                            | 7. Online in a group                                                                                                  |
|                                                                                                                                                            | 8. Online 1 on 1                                                                                                      |
|                                                                                                                                                            | 9. Other (open)                                                                                                       |
| Is this due to current or previous COVID-19 restrictions?                                                                                                  | 1. Yes                                                                                                                |
|                                                                                                                                                            | 2. No                                                                                                                 |
| Where did you participate in HIMT prior to current or previous COVID-19 restrictions?<br>(Tick ALL that apply)                                             | 1. Specialised group / challenge / box / bootcamp style training gym e.g. F45, Orange Theory, CrossFit® affiliate gym |
|                                                                                                                                                            | 2. Traditional gym (group classes) e.g. Fitness First, Crunch Fitness, Anytime Fitness                                |
|                                                                                                                                                            | 3. Traditional gym (by myself) e.g. Fitness First, Crunch Fitness, Anytime Fitness                                    |
|                                                                                                                                                            | 4. Home gym (in my own or someone else's home)                                                                        |
|                                                                                                                                                            | 5. Outdoors in a group                                                                                                |
|                                                                                                                                                            | 6. Outdoors 1 on 1                                                                                                    |
|                                                                                                                                                            | 7. Online in a group                                                                                                  |
|                                                                                                                                                            | 8. Online 1 on 1                                                                                                      |
|                                                                                                                                                            | 9. Other (open)                                                                                                       |
| Where did you participate in HIMT?<br>(Tick ALL that apply)                                                                                                | 1. Specialised group / challenge / box / bootcamp style training gym e.g. F45, Orange Theory, CrossFit® affiliate gym |
|                                                                                                                                                            | 2. Traditional gym (group classes) e.g. Fitness First, Crunch Fitness, Anytime Fitness                                |
|                                                                                                                                                            | 3. Traditional gym (by myself) e.g. Fitness First, Crunch Fitness, Anytime Fitness                                    |
|                                                                                                                                                            | 4. Home gym (in my own or someone else's home)                                                                        |

|                                                                                                                                                     |                                                                                                                                                                                                                                                                                                                                                                                                                                                                                                                                                                                                                                                                                                                                                                                                                                                                      |
|-----------------------------------------------------------------------------------------------------------------------------------------------------|----------------------------------------------------------------------------------------------------------------------------------------------------------------------------------------------------------------------------------------------------------------------------------------------------------------------------------------------------------------------------------------------------------------------------------------------------------------------------------------------------------------------------------------------------------------------------------------------------------------------------------------------------------------------------------------------------------------------------------------------------------------------------------------------------------------------------------------------------------------------|
|                                                                                                                                                     | <ol style="list-style-type: none"> <li>5. Outdoors in a group</li> <li>6. Outdoors 1 on 1</li> <li>7. Online in a group</li> <li>8. Online 1 on 1</li> <li>9. Other (open)</li> </ol>                                                                                                                                                                                                                                                                                                                                                                                                                                                                                                                                                                                                                                                                                |
| Was this due to COVID-19 restrictions?                                                                                                              | <ol style="list-style-type: none"> <li>1. Yes</li> <li>2. No</li> </ol>                                                                                                                                                                                                                                                                                                                                                                                                                                                                                                                                                                                                                                                                                                                                                                                              |
| Where did you participate in HIMT prior to COVID-19 restrictions?<br>(Tick ALL that apply)                                                          | <ol style="list-style-type: none"> <li>1. Specialised group / challenge / box / bootcamp style training gym e.g. F45, Orange Theory, CrossFit<sup>®</sup> affiliate gym</li> <li>2. Traditional gym (group classes) e.g. Fitness First, Crunch Fitness, Anytime Fitness</li> <li>3. Traditional gym (by myself) e.g. Fitness First, Crunch Fitness, Anytime Fitness</li> <li>4. Home gym (in my own or someone else's home)</li> <li>5. Outdoors in a group</li> <li>6. Outdoors 1 on 1</li> <li>7. Online in a group</li> <li>8. Online 1 on 1</li> <li>9. Other (open)</li> </ol>                                                                                                                                                                                                                                                                                  |
|                                                                                                                                                     |                                                                                                                                                                                                                                                                                                                                                                                                                                                                                                                                                                                                                                                                                                                                                                                                                                                                      |
| When did you most recently participate in HIMT?                                                                                                     | <ol style="list-style-type: none"> <li>1. Today</li> <li>2. 1-2 days ago</li> <li>3. 3-4 days ago</li> <li>4. 5-6 days ago</li> <li>5. Over 7 days ago</li> </ol>                                                                                                                                                                                                                                                                                                                                                                                                                                                                                                                                                                                                                                                                                                    |
|                                                                                                                                                     |                                                                                                                                                                                                                                                                                                                                                                                                                                                                                                                                                                                                                                                                                                                                                                                                                                                                      |
| 3. Think back to your most recent HIMT session. Please rate how you felt in the moment immediately after the physical activity that you were doing. |                                                                                                                                                                                                                                                                                                                                                                                                                                                                                                                                                                                                                                                                                                                                                                                                                                                                      |
|                                                                                                                                                     |                                                                                                                                                                                                                                                                                                                                                                                                                                                                                                                                                                                                                                                                                                                                                                                                                                                                      |
| If you are completing this survey on a mobile device, please turn your device to a landscape orientation.                                           |                                                                                                                                                                                                                                                                                                                                                                                                                                                                                                                                                                                                                                                                                                                                                                                                                                                                      |
|                                                                                                                                                     |                                                                                                                                                                                                                                                                                                                                                                                                                                                                                                                                                                                                                                                                                                                                                                                                                                                                      |
| <u>PACES 18-item Likert scale (1-7)[1].</u>                                                                                                         |                                                                                                                                                                                                                                                                                                                                                                                                                                                                                                                                                                                                                                                                                                                                                                                                                                                                      |
| Please select UP TO the TOP 3 reasons that you enjoy HIMT.                                                                                          | <ol style="list-style-type: none"> <li>1. I enjoy training in a group</li> <li>2. I enjoy being led by an instructor</li> <li>3. I enjoy when there is variety in a session</li> <li>4. I enjoy feeling competent when I do it</li> <li>5. I enjoy that it helps me stay fit</li> <li>6. I enjoy that it helps me build muscle</li> <li>7. I enjoy that the sessions are generally short</li> <li>8. I enjoy that the sessions are generally fast paced</li> <li>9. I enjoy it when there is music playing</li> <li>10. I enjoy that the workout is high-intensity</li> <li>11. I enjoy feelings of pain/ displeasure due to the high-intensity of the workout</li> <li>12. I enjoy that it is 'popular'</li> <li>13. Other (open)</li> </ol>                                                                                                                        |
|                                                                                                                                                     |                                                                                                                                                                                                                                                                                                                                                                                                                                                                                                                                                                                                                                                                                                                                                                                                                                                                      |
| Please rank your choices in order of importance. (You may only rank up to 3 choices).                                                               | <ol style="list-style-type: none"> <li>1. First most important</li> <li>2. Second most important</li> <li>3. Third most important</li> </ol>                                                                                                                                                                                                                                                                                                                                                                                                                                                                                                                                                                                                                                                                                                                         |
|                                                                                                                                                     |                                                                                                                                                                                                                                                                                                                                                                                                                                                                                                                                                                                                                                                                                                                                                                                                                                                                      |
| Please select UP TO the TOP 3 reasons that you do not enjoy HIMT.                                                                                   | <ol style="list-style-type: none"> <li>1. I do not enjoy training in a group</li> <li>2. I do not enjoy being led by an instructor</li> <li>3. I do not enjoy it when there is variety in a session</li> <li>4. I do not enjoy when I do not feel competent when I do it</li> <li>5. I do not enjoy that it does not help me stay fit enough</li> <li>6. I do not enjoy that it does not help me build muscle</li> <li>7. I do not enjoy that the sessions are generally short</li> <li>8. I do not enjoy that the sessions are generally fast paced</li> <li>9. I do not enjoy it when there is music playing</li> <li>10. I do not enjoy that the workout is high-intensity</li> <li>11. I do not enjoy the feeling of pain/displeasure due to high-intensity of the workout</li> <li>12. I do not enjoy that it is 'popular'</li> <li>13. Other (open)</li> </ol> |
|                                                                                                                                                     |                                                                                                                                                                                                                                                                                                                                                                                                                                                                                                                                                                                                                                                                                                                                                                                                                                                                      |
| Please rank your choices in order of importance. (You may only rank up to 3 choices).                                                               | <ol style="list-style-type: none"> <li>1. First most important</li> <li>2. Second most important</li> </ol>                                                                                                                                                                                                                                                                                                                                                                                                                                                                                                                                                                                                                                                                                                                                                          |
|                                                                                                                                                     |                                                                                                                                                                                                                                                                                                                                                                                                                                                                                                                                                                                                                                                                                                                                                                                                                                                                      |

| 4. Exercise Motivation                                                                                    | 3. Third most important                                                                                                                                                                                                                                                                                                                                                                                                                                                                                                                                                                                                                                                                                                                    |
|-----------------------------------------------------------------------------------------------------------|--------------------------------------------------------------------------------------------------------------------------------------------------------------------------------------------------------------------------------------------------------------------------------------------------------------------------------------------------------------------------------------------------------------------------------------------------------------------------------------------------------------------------------------------------------------------------------------------------------------------------------------------------------------------------------------------------------------------------------------------|
| Do you feel motivated to continue to participate in HIMT?                                                 | 1. Yes<br>2. No                                                                                                                                                                                                                                                                                                                                                                                                                                                                                                                                                                                                                                                                                                                            |
| How likely are you to continue to participate in HIMT?                                                    | 1. Very unlikely<br>2. Unlikely<br>3. Uncertain<br>4. Likely<br>5. Very likely                                                                                                                                                                                                                                                                                                                                                                                                                                                                                                                                                                                                                                                             |
| How likely are you to drop out of HIMT?                                                                   | 1. Very unlikely<br>2. Unlikely<br>3. Uncertain<br>4. Likely<br>5. Very likely                                                                                                                                                                                                                                                                                                                                                                                                                                                                                                                                                                                                                                                             |
| Please select UP TO the TOP 3 reasons that you feel motivated to continue to participate in HIMT.         | 1. I enjoy training in a group<br>2. I enjoy being led by an instructor<br>3. I enjoy when there is variety in a session<br>4. I enjoy feeling competent when I do it<br>5. I enjoy that it helps me stay fit<br>6. I enjoy that it helps me build muscle<br>7. I enjoy that the sessions are generally short<br>8. I enjoy that the sessions are generally fast paced<br>9. I enjoy it when there is music playing<br>10. I enjoy that the workout is high-intensity<br>11. I enjoy feelings of pain/ displeasure due to the high-intensity of the workout<br>12. I enjoy that it is 'popular'<br>13. Other (open)                                                                                                                        |
| Please rank your choices in order of importance. (You may only rank up to 3 choices).                     | 4. First most important<br>5. Second most important<br>6. Third most important                                                                                                                                                                                                                                                                                                                                                                                                                                                                                                                                                                                                                                                             |
| Please select UP TO the TOP 3 reasons that you do not feel motivated to continue to participate in HIMT.  | 1. I do not enjoy training in a group<br>2. I do not enjoy being led by an instructor<br>3. I do not enjoy it when there is variety in a session<br>4. I do not enjoy when I do not feel competent when I do it<br>5. I do not enjoy that it does not help me stay fit enough<br>6. I do not enjoy that it does not help me build muscle<br>7. I do not enjoy that the sessions are generally short<br>8. I do not enjoy that the sessions are generally fast paced<br>9. I do not enjoy it when there is music playing<br>10. I do not enjoy that the workout is high-intensity<br>11. I do not enjoy the feeling of pain/displeasure due to high-intensity of the workout<br>12. I do not enjoy that it is 'popular'<br>13. Other (open) |
| Please rank your choices in order of importance. (You may only rank up to 3 choices).                     | 1. First most important<br>2. Second most important<br>3. Third most important                                                                                                                                                                                                                                                                                                                                                                                                                                                                                                                                                                                                                                                             |
| Please select UP TO the TOP 3 reasons that you did not feel motivated to continue to participate in HIMT. | 1. I did not enjoy it<br>2. I did not enjoy training in a group<br>3. I did not enjoy being led by an instructor<br>4. I did not enjoy it when there is variety in a session<br>5. I did not enjoy when I do not feel competent when I do it<br>6. I did not enjoy that it does not help me stay fit enough<br>7. I did not enjoy that it does not help me build muscle<br>8. I did not enjoy that the sessions are generally short<br>9. I did not enjoy that the sessions are generally fast paced<br>10. I did not enjoy it when there is music playing<br>11. I did not enjoy that the workout is high-intensity                                                                                                                       |

Please rank your choices in order of importance. (You may only rank up to 3 choices).

What other type of sport, exercise or training did you start?

12. I did not enjoy the feeling of pain/displeasure due to high-intensity of the workout

13. I did not enjoy that it is 'popular'

14. I started another type of sport, exercise or training

15. It was too expensive

16. I finished a challenge

17. Family commitments were a priority

18. Work commitments were a priority

19. Other (open)

1. First most important

2. Second most important

3. Third most important

Open

Abbreviations: HIMT : High-Intensity Multimodal Training; PACES : Physical Activity Enjoyment Scale; y : years; \* : must provide value

References:

1. Kendzierski, D., & DeCarlo, K.J. (1991). Physical Activity Enjoyment Scale: Two Validation Studies. *Journal of Sport and Exercise Psychology* 13(1), 50-64. doi: 10.1123/jsep.13.1.50.
